# Supplementary material for: Origin and domestication of papaya Yh chromosome
Source: HighWire-hosted journal article supplement (doi:10.1101/gr.183905.114), 2015-03-11
Supplement: SuppFigs_Tables.docx [file SuppFigs_Tables.docx]

**Supplementary Figure 1**. Physical map of the AU9 male (MSY) and SunUp Hermaphrodite (HSY).

**Supplemental Figure 2.** Diversity in cultivated papaya fruit characteristics.

**
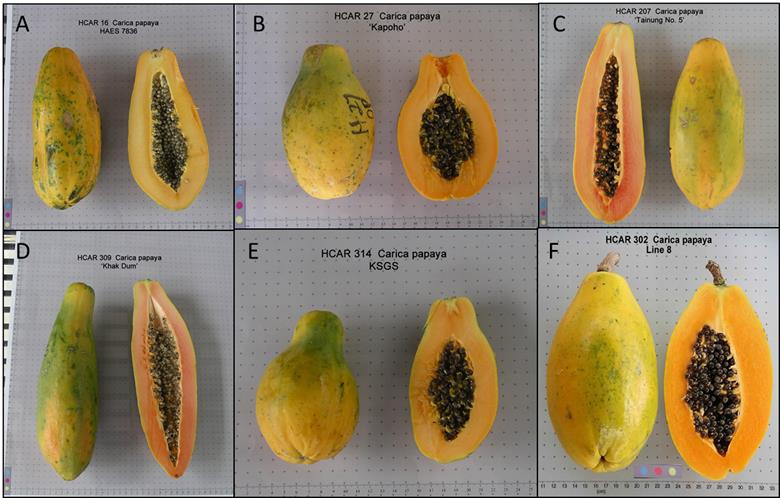
**

**Supplemental Table 1.** Summary of the transcription units found on the MSY and HSY of papaya.

| **Types of sequences** | **Total numbers of sequences** | |
| --- | --- | --- |
|  | MSY | HSY |
| **Total intact protein-coding transcription units** | **66** | **66** |
| Gene pairs present in both Y | **66** | |
| Identical | **39** | |
| Non-synonymous | **20** | |
| Synonymous | **7** | |
| Gene-pseudogene＃ | **0** | **0** |
| Genes specific to one Y | **0** | **0** |
| **Total pseudogene transcription units** | **28** | **28** |
| Pseudogene-pseudogene pairs | **28*** | |
| Pseudogene-gene＃ | **0** | **0** |
| Pseudogenes specific to one Y | **0** | **0** |
| **Total transcription units** | **94*** | **94** |
| Transcription unit pairs (present in both Y) | **94** | |
| Specific transcription units | **0** | **0** |
| **Ancestral copy present in the X as coding gene** | **49 49** | |
| **Ancestral copy present in the X as pseudogene** | **9 9** | |
| **Copy present elsewhere in the whole genome** | **11** | |

**Supplementary Table 2.** List of MSY genes compared with the papaya HSY, X and autosomal homologs.

| **MSY Gene Symbol** | **Homolog Gene Symbol** | **Putative function** | **# of Exons** | **CDS Length** | **Gene position on MSY** | | **Intron length** | **Evolutionary variations with HSY *** | **X Homolog** | **Autosome Homolog** | | | **Inversion** |
| --- | --- | --- | --- | --- | --- | --- | --- | --- | --- | --- | --- | --- | --- |
| **Superctg. #** | **Linkage Group** | **Percent Identity** |
| CpY1 | CpYh1 | Hypothetical protein | 2 | 273 | 35858 | 36233 | 103 | Identical | No | 368 | NA | 100% | 1 |
| CpY2 | CpYh2 | NA | 1 | 198 | 45118 | 45315 | 0 | Identical | No | 1657 | NA | 100% | 1 |
| PCpY1 | PCpYh1 | Zinc finger-homeodomain protein | 2 | 701 | 476258 | 476992 | 34 | Both pseudo | No | 55 | 2 | 92% | 1 |
| CpXY14 | CpXYh14 | Monodehydroascorbate reductase | 7 | 1437 | 864510 | 882179 | 16233 | Non-synonymous | Yes |  |  |  | 1 |
| CpXY13 | CpXYh13 | R2R3 Myb24 Transcription factor | 3 | 579 | 905802 | 908983 | 2603 | Identical | Yes |  |  |  | 1 |
| CpY3 | CpYh3 | NA | 1 | 213 | 1008524 | 1008736 | 0 | Identical | No | 10 | 5 | 81% | 1 |
| CpXY12 | CpXYh12 | ADP-ribosylation factor A1B | 5 | 561 | 1108771 | 1115952 | 6621 | Synonymous | Yes |  |  |  | 1 |
| CpXY8 | CpXYh8 | SYN4- sister chromatid cohesion protein 4 | 15 | 3606 | 1149413 | 1162275 | 9257 | Non-synonymous | Yes |  |  |  | 1 |
| CpXY9 | CpXYh9 | Transcription regulator | 1 | 1161 | 1205585 | 1206745 | 0 | Non-synonymous | Yes |  |  |  | 1 |
| PCpY2 | PCpYh2 | NA | 1 | 1062 | 1215566 | 1216627 | 0 | Both pseudo | No |  |  |  | 1 |
| CpY4 | CpYh4 | NA | 1 | 294 | 1222723 | 1223016 | 0 | Non-synonymous | No |  |  |  | 1 |
| PXCpXY6 | △PXCpXYh6 | Latex cyanogenic beta glucosidase | 13 | 1467 | 1232138 | 1297435 | 63831 | Identical | Pseudo |  |  |  | 1 |
| CpY5 | △CpYh5 | NA | 1 | 138 | 1245360 | 1245497 | 0 | Non-synonymous | No |  |  |  | 1 |
| CpY7 | CpYh7 | NA | 1 | 237 | 1259835 | 1260071 | 0 | Identical | No |  |  |  | 1 |
| PCpY3 | PCpYh3 | NA | 1 | 2366 | 1263863 | 1266228 | 0 | Both pseudo | No |  |  |  | 1 |
| CpY8 | CpYh8 | NA | 1 | 105 | 1290322 | 1290426 | 0 | Identical | No | 29 | 2 | 87% | 1 |
| CpY9 | CpYh9 | NA | 1 | 319 | 1290647 | 1290965 | 0 | MSY pseudo | No | 29 | 2 | 81% | 1 |
| PCpY4 | PCpYh4 | Photosystem II protein D1 | 1 | 901 | 1322984 | 1323884 | 0 | Both pseudo | No |  |  |  | 1 |
| CpY13 | △CpYh13 | NA | 1 | 261 | 1357504 | 1357764 | 0 | Identical | No |  |  |  | 1 |
| CpY12 | △CpYh12 | NA | 1 | 288 | 1361851 | 1362138 | 0 | Identical | No |  |  |  | 1 |
| CpY11 | △CpYh11 | NA | 3 | 420 | 1376752 | 1378401 | 1230 | Non-synonymous | No |  |  |  | 1 |
| PXCpXY10 | △PXCpXYh10 | RNA recognition motif-containing  protein splicing factor | 16 | 1833 | 1381272 | 1417086 | 32831 | Non-synonymous | Pseudo |  |  |  | 1 |
| PCpY7 | △PCpYh7 | NA | 1 | 447 | 1422550 | 1422996 | 0 | Both pseudo | No |  |  |  | 1 |
| PCpY6 | △PCpYh6 | NA | 1 | 237 | 1424389 | 1424625 | 0 | Both pseudo | No |  |  |  | 1 |
| PCpY5 | △PCpYh5 | NA | 1 | 234 | 1513239 | 1513472 | 0 | Both pseudo | No |  |  |  | 1 |
| PXCpXY14 | PXCpXYh14 | Chromatin/Nucleosome assembly factor | 19 | 2736 | 1542481 | 1551493 | 6275 | MSY pseudo | Pseudo |  |  |  | 1 |
| PCpY8 | PCpYh8 | NA | 2 | 375 | 1555851 | 1586117 | 29882 | Both pseudo | No |  |  |  | 1 |
| CpXY10 | CpXYh10 | Flowering locus t | 4 | 525 | 1818803 | 1821351 | 2030 | Synonymous | Yes |  |  |  | 1 |
| PXCpXY15 | PXCpXYh15 | NA | 1 | 965 | 1870232 | 1871196 | 0 | MSY pseudo | Pseudo |  |  |  | 1 |
| CpXY5 | CpXYh5 | Haloacid dehalogenase-like  hydrolase domain-containing protein | 11 | 1101 | 1879388 | 1923359 | 42810 | Non-synonymous | Yes |  |  |  | 1 |
| PCpY9 | PCpYh9 | ---NA--- | 1 | 320 | 2122879 | 2123198 | 0 | Both pseudo | No |  |  |  | 1 |
| CpY16 | CpYh16 | ---NA--- | 1 | 336 | 2127005 | 2127340 | 0 | Identical | No |  |  |  | 1 |
| PCpY10 | PCpYh10 | ATP synthase CFO subunit 1 protein | 2 | 434 | 2335456 | 2336413 | 533 | Both pseudo | No | 30 | 11 & 9 | 100% | 1 |
| PYCpXY7 | PYhCpXYh7 | EMB506 (embryo defective 506) | 6 | 583 | 3437518 | 3438796 | 699 | Both pseudo | Yes |  |  |  | 1 |
| **CpXY4 | CpXYh4 | Late embryogenesis abundant protein 18 | 1 | 294 | 3699169 | 3699462 | 0 | Identical | Yes |  |  |  | 1 |
| 3729448 | 3729741 |
| **PYCpXY5 | PYhCpXYh5 | ---NA--- | 1 | 260 | 3712537 | 3712796 | 0 | Both pseudo | Yes |  |  |  | 1 |
| 4185979 | 4186238 |
| CpXY3 | CpXYh3 | Exocyst complex subunit SEC6 | 25 | 2268 | 3794391 | 3833634 | 36992 | Identical | Yes |  |  |  | 1 |
| PYCpXY3 | PYhCpXYh3 | ---NA--- | 2 | 599 | 3800232 | 3805880 | 5021 | Both pseudo | Yes |  |  |  | 1 |
| PYCpXY2 | PYhCpXYh2 | ---NA--- | 1 | 380 | 3811895 | 3812274 | 0 | Both pseudo | Yes |  |  |  | 1 |
| CpXY2 | CpXYh2 | Somatic embryogenesis receptor kinase | 11 | 1884 | 3889009 | 3894591 | 3699 | Synonymous | Yes |  |  |  | 1 |
| CpXY1 | CpXYh1 | Regulator of Vps4 activity in the MVB pathway | 6 | 2265 | 3904027 | 3896386 | 5377 | Non-synonymous | Yes |  |  |  | 1 |
| CpY17 | CpYh17 | ---NA--- | 2 | 348 | 3980125 | 3980645 | 173 | MSY pseudo | No |  |  |  | 1 |
| CpY20 | △CpYh20 | ---NA--- | 2 | 396 | 4001665 | 4001054 | 216 | Identical | No |  |  |  | 1 |
| **CpY19 | △CpYh19 | MADS box protein | 2 | 936 | 3984950 | 3985922 | 37 | Synonymous | No | 55 | 2 | 94% | 1 |
| 3982062 | 3981090 |
| PXYCpXY3 | PXYhCpXYh3 | 50s ribosomal protein l12-1 | 1 | 653 | 4290900 | 4291552 | 0 | Both pseudo | Pseudo |  |  |  | 2 |
| CpXY7 | CpXYh7 | Leucine zipper-ef-hand (Ca binding motif) | 14 | 2286 | 4397289 | 4375233 | 19771 | Synonymous | Yes |  |  |  | 1 |
| CpXY6 | CpXYh6 | FRA3 inositol or phosphatidylinositol phosphatase | 10 | 3336 | 4435864 | 4504632 | 65433 | Non-synonymous | Yes |  |  |  | 1 |
| CpXY33 | CpXYh33 | Protein kinase atmrk1 | 4 | 681 | 4543485 | 4545724 | 1559 | Identical | Yes |  |  |  | 2 |
| CpXY17 | CpXYh17 | Peptidyl-prolyl cis-trans isomerase (CYP38) | 7 | 1347 | 4567501 | 4563067 | 3088 | Identical | Yes |  |  |  | 2 |
| CpXY18 | CpXYh18 | Ruptured pollen grain 1 | 6 | 744 | 4585241 | 4581819 | 2679 | Synonymous | Yes |  |  |  | 2 |
| PYCpXY27 | PYhCpXYh27 | ---NA--- | 2 | 245 | 4596467 | 4596187 | 36 | Both pseudo | Yes |  |  |  | 2 |
| CpXY19 | CpXYh19 | Homeobox-leucine zipper protein HAT5-like | 4 | 819 | 4645636 | 4650940 | 4486 | Non-synonymous | Yes |  |  |  | 2 |
| CpXY20 | CpXYh20 | MBD9, methyl-CpG binding | 11 | 6612 | 4700761 | 4657080 | 37070 | Non-synonymous | Yes |  |  |  | 2 |
| CpXY32 | CpXYh32 | Ribonuclease P subunit | 3 | 756 | 4725744 | 4726993 | 494 | Non-synonymous | Yes | 45 | NA | 91% | 2 |
| CpXY16 | CpXYh16 | Proteasome complex subunit | 2 | 237 | 4776372 | 4772617 | 3519 | Identical | Yes | 1914 | NA | 99% | 2 |
| CpXY15 | CpXYh15 | FU (FUSED); protein serine/threonine kinase | 20 | 3828 | 4823413 | 4850234 | 22994 | Synonymous | Yes |  |  |  | 2 |
| CpXY21 | CpXYh21 | Porin family 3 | 14 | 1272 | 4889913 | 4904966 | 13782 | Identical | Yes |  |  |  | 2 |
| PYCpXY28 | PYhCpXYh28 | DegP protease precursor | 7 | 1029 | 4909626 | 4917266 | 6612 | Both pseudo | Yes |  |  |  | 2 |
| CpXY22 | CpXYh22 | MYB family transcription factor | 2 | 243 | 4929868 | 4930276 | 166 | Non-synonymous | Yes |  |  |  | 2 |
| CpXY23 | CpXYh23 | Carbonate dehydratase, zinc ion binding | 9 | 1011 | 4954370 | 4957404 | 2024 | Identical | Yes |  |  |  | 2 |
| CpXY24 | CpXYh24 | 5'-AMP-activated protein kinase beta-1 subunit-related | 10 | 1779 | 4958779 | 4967690 | 7133 | Non-synonymous | Yes |  |  |  | 2 |
| CpXY25 | CpXYh25 | Hypothetical protein | 2 | 549 | 4975927 | 4976748 | 273 | Identical | Yes |  |  |  | 2 |
| CpXY26 | CpXYh26 | Aminophospholipid atpase,  phospholipid-translocating ATPase | 11 | 3456 | 5011654 | 5050360 | 35251 | Identical | Yes |  |  |  | 2 |
| PYCpXY30 | PYhCpXYh30 | ---NA--- | 1 | 682 | 5080461 | 5081142 | 0 | Both pseudo | Yes |  |  |  | 2 |
| PXYCpXY2 | PXYhCpXYh2 | Hypothetical protein VITISV_040650 [Vitis vinifera] | 2 | 306 | 5096388 | 5096747 | 54 | Both pseudo | Pseudo |  |  |  | 2 |
| PXCpXY21 | PXCpXYh21 | ---NA--- | 1 | 363 | 5110541 | 5110903 | 0 | Identical | Pseudo | 35 | 10 & 8 | 90% | 2 |
| CpXY27 | CpXYh27 | Protein Kinase | 19 | 2040 | 5124619 | 5135370 | 8712 | Non-synonymous | Yes |  |  |  | 2 |
| CpXY28 | CpXYh28 | Proteasome assembly chaperone3 | 5 | 264 | 5136474 | 5137753 | 1016 | Identical | Yes |  |  |  | 2 |
| CpXY31 | CpXYh31 | Asymmetric leaves 2 | 1 | 618 | 6950261 | 6950878 | 0 | Identical | Yes |  |  |  | 2 |
| CpXY29 | CpXYh29 | N-acetylglucosamine-phosphate mutase | 9 | 1689 | 6970864 | 6998579 | 26027 | Non-synonymous | Yes |  |  |  | 2 |
| CpXY30 | CpXYh30 | NUC (nutcracker); nucleic acid binding | 1 | 312 | 6993024 | 6993335 | 0 | Identical | Yes |  |  |  | 2 |
| CpXY11 | CpXYh11 | PWWP domain-containing protein | 2 | 2964 | 7416131 | 7419241 | 147 | Non-synonymous | Yes |  |  |  | 1 |
| PXYCpXY1 | PXYhCpXYh1 | Universal stress protein (USP) family protein | 4 | 840 | 7422062 | 7457157 | 34256 | Both pseudo | Pseudo |  |  |  | 1 |
| PYCpXY23 | PYhCpXYh23 | Hypothetical protein | 1 | 326 | 7442718 | 7443043 | 0 | Both pseudo | Yes |  |  |  | 1 |
| PYCpXY22 | PYhCpXYh22 | Vps51/Vps67 family protein | 6 | 3045 | 7516927 | 7536393 | 16422 | Both pseudo | Yes |  |  |  | 1 |
| PXCpXY22 | PXCpXYh22 | ---NA--- | 1 | 432 | 7541231 | 7541662 | 0 | Identical | Pseudo |  |  |  | 1 |
| CpXY34 | CpXYh34 | Metal-dependent phosphohydrolase HD  domain-containing protein | 18 | 1418 | 7622597 | 7631257 | 7243 | MSY pseudo | Yes |  |  |  | collinear |
| CpXY35 | CpXYh35 | Calcium homeostasis regulater-like protein | 3 | 819 | 7635148 | 7636840 | 874 | Identical | Yes |  |  |  | collinear |
| CpXY36 | CpXYh36 | Formate dehydrogenase | 6 | 1164 | 7637407 | 7639832 | 1262 | Identical | Yes |  |  |  | collinear |
| CpXY37 | CpXYh37 | ERA1 (ENHANCED RESPONSE TO ABA 1);  farnesyltranstransferase | 14 | 1299 | 7679935 | 7687091 | 5858 | Non-synonymous | Yes |  |  |  | collinear |
| CpXY38 | CpXYh38 | Integral membrane protein | 3 | 903 | 7691646 | 7693832 | 1284 | Identical | Yes |  |  |  | collinear |
| CpXY39 | CpXYh39 | Exonuclease family protein | 6 | 1020 | 7709274 | 7711016 | 723 | Identical | Yes |  |  |  | collinear |
| CpXY40 | CpXYh40 | Kinesin light chain | 2 | 1845 | 7773062 | 7774986 | 80 | Identical | Yes |  |  |  | collinear |
| CpXY41 | CpXYh41 | Carboxilic ester hydrolase | 6 | 1149 | 7776008 | 7779361 | 2205 | Identical | Yes |  |  |  | collinear |
| CpXY42 | CpXYh42 | AO (L-ASPARTATE OXIDASE); oxidoreductase | 7 | 1956 | 7782806 | 7786956 | 2195 | Identical | Yes |  |  |  | collinear |
| CpXY43 | CpXYh43 | ADP-ribosylation factor | 10 | 1287 | 7797735 | 7814265 | 15244 | Identical | Yes |  |  |  | collinear |
| CpXY44 | CpXYh44 | Protein phosphatase 4 core regulatory subunit R2 | 9 | 897 | 7825444 | 7857537 | 31197 | Identical | Yes |  |  |  | collinear |
| CpXY45 | CpXYh45 | Guanosine-3',5'-bis(diphosphate) 3'-pyrophosphohydrolase | 11 | 1419 | 7868747 | 7911631 | 41466 | Identical | Yes |  |  |  | collinear |
| CpXY46 | CpXYh46 | ---NA--- | 1 | 498 | 7920881 | 7921378 | 0 | Identical | Yes |  |  |  | collinear |
| CpXY47 | CpXYh47 | ---NA--- | 36 | 3684 | 7986960 | 8007584 | 16941 | Identical | Pseudo |  |  |  | collinear |
| CpXY48 | CpXYh48 | Mitochondrial NADH ubiquinone  oxidoreductase 13kd-like subunit | 2 | 174 | 8011342 | 8011674 | 159 | Identical | Yes |  |  |  | collinear |
| PXYCpXY4 | PXYhCpXYh4 | ---NA--- | 1 | 906 | 8012928 | 8013833 | 0 | Both pseudo | Pseudo |  |  |  | collinear |
| CpXY49 | CpXYh49 | Pentatricopeptide repeat-containing protein | 10 | 3352 | 8019328 | 8025831 | 3152 | Non-synonymous | Yes |  |  |  | collinear |
| CpXY50 | CpXYh50 | Hypothetical protein | 2 | 309 | 8033237 | 8033626 | 81 | Identical | Yes |  |  |  | collinear |

Genes are numbered in consecutive order as they appear on the MSY physical map.

| Pseudogenes are denoted by a "P": PXCpXY= X transcript is a pseudogene; PYCpXY = Y transcript is a psuedogene; PXYCpXY = Both X and Y transcript units are pseudogenes. |
| --- |

NA- Not Available

* "Identical": 100% nucleotide identity; "Synonymous": nucleotide substitution does not modify amino acid sequence; "Non-synonymous": nucleotide substitution results in a change in amino acid.

** duplication

Highly strict gene conservation between the MSY and HSY.

△Seeming reversed order for a few HSY genes due to the order error from previous HSY genes annotation.

Missed gene CpY18 and PYCpXY31 on the MSY due to gap in the MSY sequence.

**Supplemental Table 3.** Repeat content in the MSY, HSY and the papaya genome

| **Sequence source** | **‘AU9’ MSY (8,077,450 bp)** | | | **‘SunUp’ HSY (8,070,272 bp)** | | | **Papaya genome (271,000,000 bp)** | |
| --- | --- | --- | --- | --- | --- | --- | --- | --- |
| Repeat class/family | No. of elements | Length occupied (bp) | Percentage of sequence | No. of elements | Length occupied (bp) | Percentage of sequences | Length occupied (bp) | Percentage of sequences |
| Retroelements2 | 3,746 | 3,498,031 | 43.33% | 3,962 | 3,491,027 | 43.30% | 115,601,100 | 42.70% |
| LINEs | 54 | 41,330 | 0.50% | 54 | 41,330 | 0.50% | 2,700,000 | 1.00% |
| LTR elements | 3,692 | 3,449,697 | 42.70% | 3,908 | 3,449,697 | 42.80% | 90,900,000 | 33.50% |
| DNA elements | 5 | 6,109 | 0.09% | 9 | 6,732 | 0.10% | 534,200 | 0.20% |
| Unclassified | 5,504 | 2,902,233 | 35.93% | 5,504 | 2,902,233 | 36% | 24,298,200 | 9.00% |
| Total interspersed repeats | 9,474 | 6,399,369 | 79.23% | 9,475 | 6,399,992 | 79.30% | 140,433,500 | 51.80% |

**Supplemental Table 4.** Collection sites of wild Costa Rican papaya

| **Accession** | **Sex** | **GPS Coordinates** | **Operational Population** | **Region** | **MSY Population** |
| --- | --- | --- | --- | --- | --- |
| Cp11 | M | 9° 46.538’ N, 82° 54.546’ W | 1 | Caribbean | MSY1 |
| Cp44 | M | 9° 49.713’ N, 82° 55.339’ W | 1 | Caribbean | MSY1 |
| Cp50 | M | 10° 01.641’ N, 83° 15.118’ W | 2 | Caribbean | MSY1 |
| Cp54 | M | 10° 02.655’ N, 83° 16.768’ W | 2 | Caribbean | MSY1 |
| Cp57 | M | 10° 03.886’ N, 83° 22.046’ W | 2 | Caribbean | MSY2 |
| Cp66 | M | 10° 04.157’ N, 84° 46.187’ W | 3 | N Pacific | MSY2 |
| Cp112 | M | 10° 13.565’ N, 85° 07.665’ W | 4 | N Pacific | MSY3 |
| Cp82 | M | 10° 27.753’ N, 85° 08.870’ W | 5 | N Pacific | MSY3 |
| Cp96 | M | 10° 27.810’ N, 85° 08.304’ W | 5 | N Pacific | MSY3 |
| Cp125 | M | 9° 55.915’ N, 84° 57.774’ W | 6 | Nicoya | MSY3 |
| Cp128 | M | 9° 55.314’ N, 84° 57.558’ W | 6 | Nicoya | MSY3 |
| Cp171 | M | 9° 53.855’ N, 84° 56.173’ W | 6 | Nicoya | MSY3 |
| Cp172 | M | 9° 53.867’ N, 84° 56.175’ W | 6 | Nicoya | MSY3 |
| Cp173 | M | 9° 53.870’ N, 84° 56.180’ W | 6 | Nicoya | MSY3 |
| Cp242 | M | 9° 35.267’ N, 84° 37.294’ W | 7 | Central Pacific | MSY2 |
| Cp245 | M | 9° 41.125’ N, 84° 39.064’ W | 7 | Central Pacific | MSY3 |
| Cp185 | M | 9° 24.150’ N, 84° 04.735’ W | 8 | Central Pacific | MSY1 |
| Cp188 | M | 9° 23.384’ N, 84° 03.696’ W | 8 | Central Pacific | MSY2 |
| Cp202 | M | 9° 12.835’ N, 83° 49.199’ W | 9 | S Pacific | MSY1 |
| Cp203 | M | 9° 12.842’ N, 83° 49.200’ W | 9 | S Pacific | MSY1 |
| Cp204 | M | 9° 12.838’ N, 83° 49.201’ W | 9 | S Pacific | MSY1 |
| Cp221 | M | 9° 00.221’ N, 83° 34.209’ W | 10 | S Pacific | MSY2 |
| Cp222 | M | 9° 00.221’ N, 83° 34.208’ W | 10 | S Pacific | MSY1 |
| Cp227 | M | 8° 59.947’ N, 83° 33.782’ W | 10 | S Pacific | MSY2 |

**Supplemental Table 5.** Summary of sequencing statistics of resequenced papaya.

| **Name** | **Origin** | **Cultivar** | **Sex** | **No. of Read 1** | **No. of Read 2** | **Coverage** |
| --- | --- | --- | --- | --- | --- | --- |
| Cp11 | Wild | NA | M | 30,596,007 | 30,596,007 | 13.3 |
| Cp44 | Wild | NA | M | 45,068,687 | 45,068,687 | 19.6 |
| Cp112 | Wild | NA | M | 37,729,972 | 37,729,972 | 16.4 |
| Cp203 | Wild | NA | M | 38,088,943 | 38,088,943 | 16.6 |
| Cp204 | Wild | NA | M | 37,218,734 | 37,218,734 | 16.2 |
| Cp54 | Wild | NA | M | 29,190,589 | 29,190,589 | 12.7 |
| Cp57 | Wild | NA | M | 25,835,569 | 25,835,569 | 11.2 |
| Cp66 | Wild | NA | M | 17,529,174 | 17,529,174 | 7.6 |
| Cp82 | Wild | NA | M | 40,331,523 | 40,331,523 | 17.5 |
| Cp96 | Wild | NA | M | 39,844,156 | 39,844,156 | 17.3 |
| Cp125 | Wild | NA | M | 52,530,869 | 52,530,869 | 22.8 |
| Cp128 | Wild | NA | M | 45,642,555 | 45,642,555 | 19.8 |
| Cp221 | Wild | NA | M | 46,838,557 | 46,838,557 | 20.4 |
| Cp172 | Wild | NA | M | 51,569,790 | 51,569,790 | 22.4 |
| Cp173 | Wild | NA | M | 25,526,766 | 25,526,766 | 11.1 |
| Cp242 | Wild | NA | M | 20,800,737 | 20,800,737 | 9 |
| Cp245 | Wild | NA | M | 46,641,984 | 46,641,984 | 20.3 |
| Cp185 | Wild | NA | M | 22,674,546 | 22,674,546 | 9.9 |
| Cp50 | Wild | NA | M | 16,498,230 | 16,498,230 | 7.2 |
| Cp188 | Wild | NA | M | 28,451,281 | 28,451,281 | 12.4 |
| Cp202 | Wild | NA | M | 31,997,441 | 31,997,441 | 13.9 |
| Cp171 | Wild | NA | M | 41,564,101 | 41,564,101 | 18.1 |
| Cp222 | Wild | NA | M | 57,093,669 | 57,093,669 | 24.8 |
| Cp227 | Wild | NA | M | 122,109,612 | 122,109,612 | 53.1 |
| HCAR 16 | Cultivated | ‘HAES 7836' | H | 30,405,103 | 30,405,103 | 11.6 |
| HCAR 17 | Cultivated | 'Saipan Red' | H | 47,308,928 | 47,308,928 | 18 |
| HCAR 20 | Cultivated | 'Khag Naun' | H | 27,625,175 | 27,625,175 | 10.5 |
| HCAR 27 | Cultivated | 'Kapoho' | H | 48,174,233 | 48,174,233 | 18.4 |
| HCAR 196 | Cultivated | 'Higgins' | H | 26,815,590 | 26,815,590 | 10.2 |
| HCAR 207 | Cultivated | 'Tainung No. 5' | H | 18,931,566 | 18,931,566 | 7.2 |
| HCAR 217 | Cultivated | 'Puerto Rico 6-65' | H | 18,322,599 | 18,322,599 | 7 |
| HCAR 302 | Cultivated | Line 8 | H | 16,799,494 | 16,799,494 | 6.4 |
| HCAR 309 | Cultivated | 'Khak Dum' | H | 13,912,543 | 13,912,543 | 5.3 |
| HCAR 310 | Cultivated | 'Waimanalo' | H | 15,850,446 | 15,850,446 | 6 |
| HCAR 314 | Cultivated | ‘KSGS’ | H | 15,531,622 | 15,531,622 | 5.9 |
| HCAR 321 | Cultivated | no7 323 | H | 29,987,992 | 29,987,992 | 11.4 |
|  |  |  |  |  | **Average Coverage** | **15.6** |

**Supplemental Table 6.** Summary of SNP/InDels statistics

| **Accession** | **Origin** | **Population** | **Sequence coverage** | **Number of SNPs** | **Trans-itions** | **Trans-versions** | **Number of InDels** |
| --- | --- | --- | --- | --- | --- | --- | --- |
| Cp112 | Wild | HSY/MSY | 16.4 | 5975 | 4377 | 1598 | 272 |
| Cp125 | Wild | HSY/MSY | 22.8 | 5775 | 4183 | 1592 | 280 |
| Cp128 | Wild | HSY/MSY | 19.8 | 5663 | 4071 | 1592 | 268 |
| Cp171 | Wild | HSY/MSY | 18.1 | 5978 | 4337 | 1641 | 258 |
| Cp172 | Wild | HSY/MSY | 22.4 | 5965 | 4296 | 1669 | 284 |
| Cp173 | Wild | HSY/MSY | 11.1 | 5468 | 3975 | 1493 | 264 |
| Cp245 | Wild | HSY/MSY | 20.3 | 5817 | 4219 | 1598 | 266 |
| Cp82 | Wild | HSY/MSY | 17.5 | 6161 | 4405 | 1756 | 260 |
| Cp96 | Wild | HSY/MSY | 17.3 | 6152 | 4381 | 1771 | 258 |
| HCAR 16 | Cultivated | HSY/MSY | 11.6 | 5216 | 3783 | 1433 | 224 |
| HCAR 17 | Cultivated | HSY/MSY | 18 | 4901 | 3493 | 1408 | 216 |
| HCAR 196 | Cultivated | HSY/MSY | 10.2 | 5081 | 3640 | 1441 | 210 |
| HCAR 20 | Cultivated | HSY/MSY | 10.5 | 4917 | 3559 | 1358 | 212 |
| HCAR 207 | Cultivated | HSY/MSY | 7.2 | 5295 | 3817 | 1478 | 220 |
| HCAR 217 | Cultivated | HSY/MSY | 7 | 5025 | 3596 | 1429 | 216 |
| HCAR 27 | Cultivated | HSY/MSY | 18.4 | 4741 | 3408 | 1333 | 214 |
| HCAR 302 | Cultivated | HSY/MSY | 6.4 | 4668 | 3353 | 1315 | 222 |
| HCAR 309 | Cultivated | HSY/MSY | 5.3 | 5303 | 3788 | 1515 | 224 |
| HCAR 310 | Cultivated | HSY/MSY | 6 | 4952 | 3544 | 1408 | 218 |
| HCAR 314 | Cultivated | HSY/MSY | 5.9 | 4838 | 3514 | 1324 | 218 |
| HCAR 321 | Cultivated | HSY/MSY | 11.4 | 5037 | 3610 | 1427 | 230 |
| Cp11 | Wild | MSY1 | 13.3 | 25972 | 19115 | 6857 | 2038 |
| Cp185 | Wild | MSY1 | 9.9 | 25489 | 18626 | 6863 | 1866 |
| Cp202 | Wild | MSY1 | 13.9 | 25783 | 19026 | 6757 | 2084 |
| Cp203 | Wild | MSY1 | 16.6 | 26119 | 19200 | 6919 | 2170 |
| Cp204 | Wild | MSY1 | 16.2 | 26242 | 19230 | 7012 | 2068 |
| Cp222 | Wild | MSY1 | 24.8 | 25984 | 19206 | 6778 | 2190 |
| Cp44 | Wild | MSY1 | 19.6 | 26763 | 19736 | 7027 | 2192 |
| Cp50 | Wild | MSY1 | 7.2 | 25310 | 18448 | 6862 | 1708 |
| Cp54 | Wild | MSY1 | 12.7 | 25588 | 18831 | 6757 | 2060 |
| Cp188 | Wild | MSY2 | 12.4 | 18983 | 13790 | 5193 | 1206 |
| Cp221 | Wild | MSY2 | 20.4 | 19349 | 14139 | 5210 | 1436 |
| Cp227 | Wild | MSY2 | 53.1 | 19481 | 14168 | 5313 | 1290 |
| Cp242 | Wild | MSY2 | 9 | 18256 | 13234 | 5022 | 1162 |
| Cp57 | Wild | MSY2 | 11.2 | 18620 | 13549 | 5071 | 1228 |
| Cp66 | Wild | MSY2 | 7.6 | 18767 | 13524 | 5243 | 1030 |

**Supplemental Table 7.** Statistics from the STRUCTURE analysis

| **Accession** | **Population** | **Proportion of each subgroup** | | |
| --- | --- | --- | --- | --- |
| **MSY1** | **MSY2** | **MSY/HSY** |
| Cp11 | MSY1 | 0.99999 | 0.000003 | 0.000003 |
| Cp202 | MSY1 | 0.99999 | 0.000003 | 0.000003 |
| Cp203 | MSY1 | 0.99999 | 0.000002 | 0.000002 |
| Cp204 | MSY1 | 0.99999 | 0.000002 | 0.000002 |
| Cp44 | MSY1 | 0.99999 | 0.000002 | 0.000003 |
| Cp50 | MSY1 | 0.970677 | 0.000002 | 0.029316 |
| Cp54 | MSY1 | 0.99999 | 0.000003 | 0.000003 |
| Cp222 | MSY1 | 0.99999 | 0.000002 | 0.000003 |
| Cp185 | MSY1 | 0.99999 | 0.000002 | 0.000002 |
| Cp188 | MSY2 | 0.000002 | 0.99999 | 0.000002 |
| Cp221 | MSY2 | 0.000003 | 0.99999 | 0.000002 |
| Cp227 | MSY2 | 0.000002 | 0.99999 | 0.000002 |
| Cp242 | MSY2 | 0.000003 | 0.99999 | 0.000002 |
| Cp57 | MSY2 | 0.000002 | 0.99999 | 0.000002 |
| Cp66 | MSY2 | 0.000002 | 0.99999 | 0.000002 |
| Cp112 | HSY/MSY | 0.000003 | 0.000002 | 0.99999 |
| Cp125 | HSY/MSY | 0.000003 | 0.000002 | 0.99999 |
| Cp128 | HSY/MSY | 0.000003 | 0.000002 | 0.99999 |
| Cp171 | HSY/MSY | 0.000003 | 0.000002 | 0.99999 |
| Cp172 | HSY/MSY | 0.000003 | 0.000002 | 0.99999 |
| Cp173 | HSY/MSY | 0.000003 | 0.000002 | 0.99999 |
| Cp245 | HSY/MSY | 0.000003 | 0.000002 | 0.99999 |
| Cp82 | HSY/MSY | 0.000002 | 0.000002 | 0.99999 |
| Cp96 | HSY/MSY | 0.000003 | 0.000002 | 0.99999 |
| HCAR_16 | HSY/MSY | 0.000003 | 0.000002 | 0.99999 |
| HCAR_17 | HSY/MSY | 0.000002 | 0.000002 | 0.99999 |
| HCAR_196 | HSY/MSY | 0.000002 | 0.000002 | 0.99999 |
| HCAR_207 | HSY/MSY | 0.000003 | 0.000002 | 0.99999 |
| HCAR_20 | HSY/MSY | 0.000002 | 0.000002 | 0.99999 |
| HCAR_217 | HSY/MSY | 0.000003 | 0.000002 | 0.99999 |
| HCAR_27 | HSY/MSY | 0.000002 | 0.000002 | 0.99999 |
| HCAR_302 | HSY/MSY | 0.000003 | 0.000002 | 0.99999 |
| HCAR_309 | HSY/MSY | 0.000002 | 0.000002 | 0.99999 |
| HCAR_310 | HSY/MSY | 0.000002 | 0.000002 | 0.99999 |
| HCAR_314 | HSY/MSY | 0.000003 | 0.000002 | 0.99999 |
| HCAR_321 | HSY/MSY | 0.000003 | 0.000002 | 0.99999 |

**Supplemental Table 8.** Pairwise FST in the PAR region between Y haplotypes

|  |  | **Pairwise Fst** | | | |
| --- | --- | --- | --- | --- | --- |
|  |  | HSY | MSY1 | MSY2 | MSY3 |
| **Pairwise Fst** | HSY | -- | 0.11 | 0.12 | 0.10 |
| MSY1 | 0.11 | -- | 0.08 | 0.09 |
| MSY2 | 0.12 | 0.08 | -- | 0.08 |
| MSY3 | 0.10 | 0.09 | 0.08 | -- |
